# Supplementary material for: Chalcogen bonding interactions in a series of aromatic selenocyanates
Source: Royal Society of Chemistry journal article supplement (doi:10.1039/d3ce00745f), 2023-01-01
Supplement: d3ce00745f1.pdf [file d3ce00745f1.pdf]

## Chalcogen bonding interactions in a series of aromatic organic selenocyanates

Jan Alfuth,<sup>a,b</sup> Olivier Jeannin,<sup>a</sup> and Marc Fourmigué<sup>a,\*</sup>

<sup>a</sup> Université de Rennes, CNRS, ISCR (Institut des Sciences Chimiques de Rennes) UMR 6226, 35000 Rennes, France

<sup>b</sup> Department of Organic Chemistry, Gdańsk University of Technology, 80-233 Gdańsk, Poland

### SUPPLEMENTARY INFORMATION

|                                   |        |
|-----------------------------------|--------|
| <b>Fig S1, S2</b>                 | page 2 |
| <b>Table S1</b>                   | page 3 |
| ESP calculations, <b>Table S2</b> | page 5 |
| NMR spectra                       | page 6 |

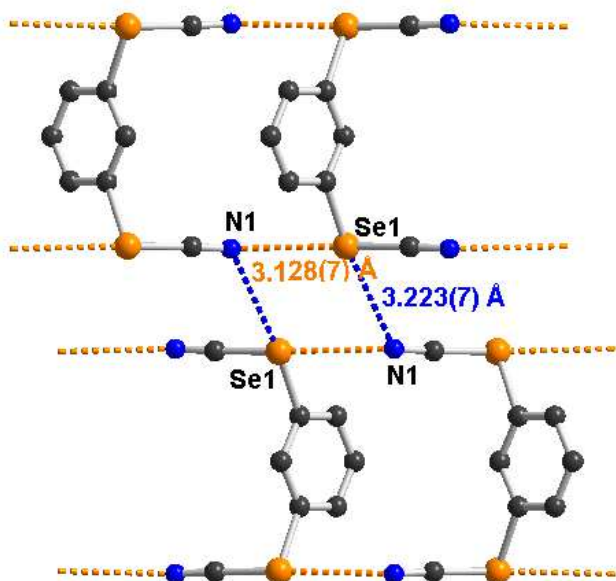

**Fig S1** Detail of the solid-state organization for **2**. ChB interactions in the prolongation of the (NC)–Se bonds are in orange dotted lines, those in the prolongation of the C<sub>Ar</sub>–Se bond in blue dotted lines.

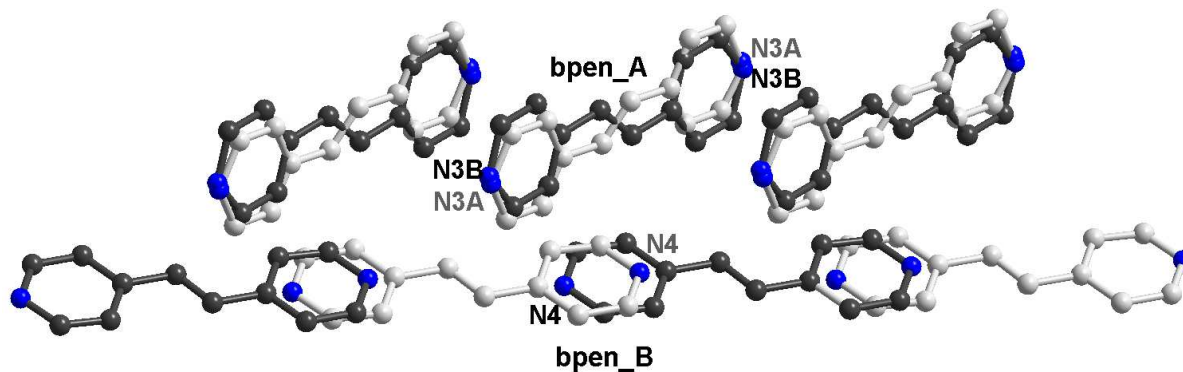

**Fig S2** Detail of the disorder model of the two crystallographically independent bpen molecules in its adduct with

**Table S1** Crystallographic data

| Compound                                | <b>1d</b>                                                      | <b>2</b>                                                     | <b>3</b>                                                      |
|-----------------------------------------|----------------------------------------------------------------|--------------------------------------------------------------|---------------------------------------------------------------|
| CCDC                                    | 2280515                                                        | 2280516                                                      | 2280517                                                       |
| Formula                                 | C <sub>12</sub> H <sub>12</sub> N <sub>2</sub> Se <sub>2</sub> | C <sub>8</sub> H <sub>4</sub> N <sub>2</sub> Se <sub>2</sub> | C <sub>6</sub> H <sub>2</sub> N <sub>2</sub> SSe <sub>2</sub> |
| FW (g·mol <sup>-1</sup> )               | 342.16                                                         | 286.05                                                       | 292.08                                                        |
| T (K)                                   | 150(2)                                                         | 293(2)                                                       | 150(2)                                                        |
| Crystal system                          | monoclinic                                                     | orthorhombic                                                 | orthorhombic                                                  |
| Space group                             | P2 <sub>1</sub> /c                                             | Pnma                                                         | Pnma                                                          |
| a (Å)                                   | 18.0460(12)                                                    | 11.563(6)                                                    | 11.2833(19)                                                   |
| b (Å)                                   | 8.3234(5)                                                      | 17.139(8)                                                    | 18.088(3)                                                     |
| c (Å)                                   | 18.3738(12)                                                    | 4.8436(19)                                                   | 4.0560(7)                                                     |
| α (deg)                                 | 90.00                                                          | 90.00                                                        | 90.00                                                         |
| β (deg)                                 | 118.457(3)                                                     | 90.00                                                        | 90.00                                                         |
| γ (deg)                                 | 90.00                                                          | 90.00                                                        | 90.00                                                         |
| V (Å <sup>3</sup> )                     | 2426.4(3)                                                      | 959.9(8)                                                     | 827.8(2)                                                      |
| Z                                       | 8                                                              | 4                                                            | 4                                                             |
| Cryst. dim. (mm)                        | 0.34×0.12×0.10                                                 | 0.15×0.06×0.02                                               | 0.15×0.05×0.04                                                |
| D <sub>calc</sub> (g·cm <sup>-3</sup> ) | 1.873                                                          | 1.979                                                        | 2.344                                                         |
| Radiation source                        | Mo-Kα                                                          | Mo-Kα                                                        | Mo-Kα                                                         |
| μ (mm <sup>-1</sup> )                   | 6.068                                                          | 7.648                                                        | 9.114                                                         |
| Total refls                             | 16796                                                          | 5309                                                         | 6457                                                          |
| Abs. corr.                              | multi-scan                                                     | multi-scan                                                   | multi-scan                                                    |
| T <sub>min</sub> , T <sub>max</sub>     | 0.422, 0.545                                                   | 0.582, 0.858                                                 | 0.585, 0.695                                                  |
| Uniq refls (R <sub>int</sub> )          | 5489 (0.0467)                                                  | 1132 (0.0792)                                                | 990 (0.0272)                                                  |
| Refl. (I > 2σ(I))                       | 3820                                                           | 672                                                          | 935                                                           |
| GOF                                     | 0.977                                                          | 1.056                                                        | 1.095                                                         |
| R1, wR2 (I > 2σ(I))                     | 0.0373, 0.0609                                                 | 0.0688, 0.1798                                               | 0.0182, 0.0449                                                |
| R1, wR2 (all data)                      | 0.0694, 0.0669                                                 | 0.1206, 0.2156                                               | 0.0194, 0.0453                                                |
| Res. dens. (e/Å <sup>3</sup> )          | +0.623, -0.644                                                 | +1.056, -1.424                                               | +0.614, -0.481                                                |

**Table S1** (continued) Crystallographic data

| Compound                                | <b>4</b>                                                     | <b>(2)</b> <sub>2</sub> (bpen_A)(bpen_B) <sub>0.5</sub>        | <b>(4)</b> (bpen)                                              |
|-----------------------------------------|--------------------------------------------------------------|----------------------------------------------------------------|----------------------------------------------------------------|
| CCDC                                    | 2280518                                                      | 2280519                                                        | 2280520                                                        |
| Formula                                 | C <sub>8</sub> H <sub>4</sub> N <sub>2</sub> Se <sub>2</sub> | C <sub>34</sub> H <sub>23</sub> N <sub>7</sub> Se <sub>4</sub> | C <sub>20</sub> H <sub>14</sub> N <sub>4</sub> Se <sub>2</sub> |
| FW (g·mol <sup>-1</sup> )               | 286.05                                                       | 845.43                                                         | 468.27                                                         |
| T (K)                                   | 150(2)                                                       | 150(2)                                                         | 150(2)                                                         |
| Crystal system                          | monoclinic                                                   | triclinic                                                      | monoclinic                                                     |
| Space group                             | P2 <sub>1</sub> /c                                           | P $\bar{1}$                                                    | P2 <sub>1</sub> /c                                             |
| a (Å)                                   | 9.1170(12)                                                   | 7.4494(15)                                                     | 8.8342(15)                                                     |
| b (Å)                                   | 4.0552(5)                                                    | 9.201(2)                                                       | 14.079(3)                                                      |
| c (Å)                                   | 11.8113(13)                                                  | 12.306(3)                                                      | 7.6447(14)                                                     |
| $\alpha$ (deg)                          | 90.00                                                        | 74.580(8)                                                      | 90.00                                                          |
| $\beta$ (deg)                           | 95.910(5)                                                    | 89.306(7)                                                      | 110.592(7)                                                     |
| $\gamma$ (deg)                          | 90.00                                                        | 88.669(7)                                                      | 90.00                                                          |
| V (Å <sup>3</sup> )                     | 434.36(9)                                                    | 812.9(3)                                                       | 890.1(3)                                                       |
| Z                                       | 2                                                            | 1                                                              | 2                                                              |
| Cryst. dim. (mm)                        | 0.11×0.05×0.03                                               | 0.13×0.08×0.03                                                 | 0.09×0.08×0.06                                                 |
| D <sub>calc</sub> (g·cm <sup>-3</sup> ) | 2.187                                                        | 1.727                                                          | 1.747                                                          |
| Radiation source                        | Mo-K $\alpha$                                                | Mo-K $\alpha$                                                  | Mo-K $\alpha$                                                  |
| $\mu$ (mm <sup>-1</sup> )               | 8.451                                                        | 4.55                                                           | 4.165                                                          |
| Total refls                             | 4064                                                         | 16229                                                          | 8351                                                           |
| Abs. corr.                              | multi-scan                                                   | multi-scan                                                     | multi-scan                                                     |
| T <sub>min</sub> , T <sub>max</sub>     | 0.608, 0.776                                                 | 0.652, 0.872                                                   | 0.694, 0.779                                                   |
| Uniq refls (R <sub>int</sub> )          | 958 (0.025)                                                  | 3325 (0.0448)                                                  | 2014 (0.0299)                                                  |
| Refl. (I > 2 $\sigma$ (I))              | 850                                                          | 2964                                                           | 1906                                                           |
| GOF                                     | 1.114                                                        | 1.136                                                          | 1.095                                                          |
| R1, wR2 (I > 2 $\sigma$ (I))            | 0.0184, 0.0422                                               | 0.0320, 0.0759                                                 | 0.0194, 0.0498                                                 |
| R1, wR2 (all data)                      | 0.0214, 0.0435                                               | 0.0361, 0.0783                                                 | 0.021, 0.0507                                                  |
| Res. dens. (e/Å <sup>3</sup> )          | +0.305, -0.514                                               | +0.637, -0.58                                                  | +0.382, -0.52                                                  |

## ESP calculations

Molecular structures of the four compounds have been optimized in gas phase (vacuum) with Gaussian09 software<sup>1</sup> using Density Functional Theory. B3LYP functional was used, completed with D3 dispersion Grimme dispersion correction.<sup>2</sup> The Def2TZVPP basis set was employed for all atoms.<sup>3</sup> Frequency calculations were performed in order to check that true energy minima were obtained. Isosurfaces of electron density ( $\rho = 0.002$  a.u.) mapped with the corresponding total electrostatic potential were calculated and drawn with AIMAll software.<sup>4</sup> Values of  $V_{S,max}$  of all  $\sigma$ -holes on Se atoms and  $V_{S,min}$  of N atoms are reported in Table S2.

**Table S2**  $V_{S,max}$  values calculated for the different ChB donors

|                         |               | $\sigma$ -hole on Se<br>(stronger, opposite to CN) |        |          | $\sigma$ -hole on Se<br>(weaker, opposite to Ph) |        |          | ESP on N |         |          |       |
|-------------------------|---------------|----------------------------------------------------|--------|----------|--------------------------------------------------|--------|----------|----------|---------|----------|-------|
|                         |               | Ha                                                 | kJ/mol | kcal/mol | Ha                                               | kJ/mol | kcal/mol | Ha       | kJ/mol  | kcal/mol |       |
|                         |               | <b>ISOVALUE = 0.001</b>                            |        |          |                                                  |        |          |          |         |          |       |
|                         | <b>PhSeCN</b> | 0.0508                                             | 133.4  | 31.9     | 0.0340                                           | 89.3   | 21.3     | -0.0571  | -149.9  | -35.8    |       |
|                         | <b>2</b>      | 0.0661                                             | 173.5  | 41.5     | 0.0447                                           | 117.4  | 28.0     | -0.0504  | -132.3  | -31.6    |       |
|                         | <b>3</b>      | 0.0571                                             | 149.9  | 35.8     | 0.0472                                           | 123.9  | 29.6     | -0.0566  | -148.6  | -35.5    |       |
|                         | <b>4</b>      | 0.0609                                             | 159.9  | 38.2     | 0.0434                                           | 113.9  | 27.2     | -0.0503  | -132.1  | -31.6    |       |
|                         | <b>1d</b>     |                                                    | 0.0506 | 132.9    | 31.8                                             | 0.0354 | 92.9     | 22.2     | -0.0614 | -161.2   | -38.5 |
|                         |               |                                                    | 0.0417 | 109.5    | 26.2                                             | 0.0302 | 79.3     | 19.0     | -0.0601 | -157.8   | -37.7 |
| <b>ISOVALUE = 0.002</b> |               |                                                    |        |          |                                                  |        |          |          |         |          |       |
|                         | <b>PhSeCN</b> | 0.0671                                             | 176.2  | 42.1     | 0.0486                                           | 127.6  | 30.5     | -0.0641  | -168.3  | -40.2    |       |
|                         | <b>2</b>      | 0.0831                                             | 218.2  | 52.1     | 0.0601                                           | 157.8  | 37.7     | -0.0570  | -149.7  | -35.8    |       |
|                         | <b>3</b>      | 0.0731                                             | 191.9  | 45.9     | 0.0633                                           | 166.2  | 39.7     | -0.0632  | -165.9  | -39.7    |       |
|                         | <b>4</b>      | 0.0782                                             | 205.3  | 49.1     | 0.0587                                           | 154.1  | 36.8     | -0.0569  | -149.4  | -35.7    |       |
|                         | <b>1d</b>     |                                                    | 0.0654 | 171.7    | 41.0                                             | 0.0497 | 130.5    | 31.2     | -0.0683 | -179.3   | -42.9 |
|                         |               |                                                    | 0.0565 | 148.3    | 35.5                                             | 0.0447 | 117.4    | 28.0     | -0.0673 | -176.7   | -42.2 |

## NMR spectra

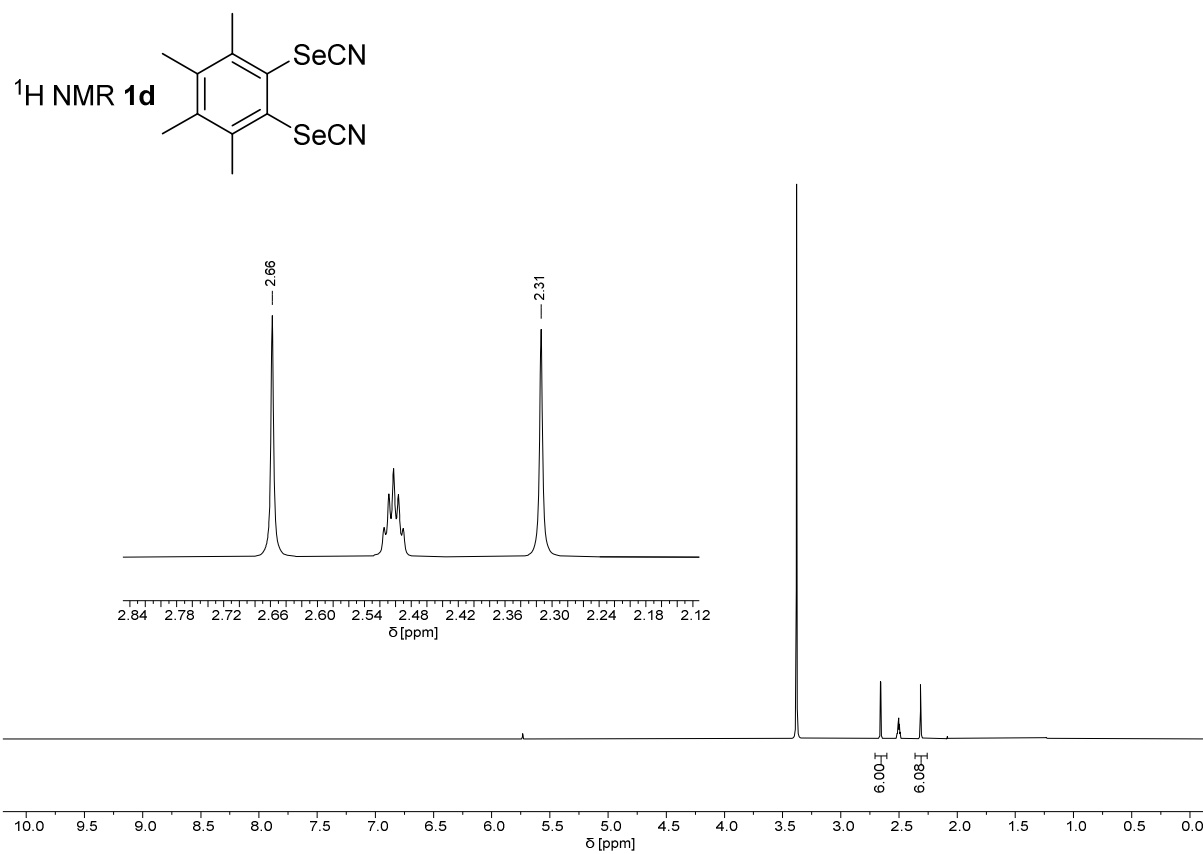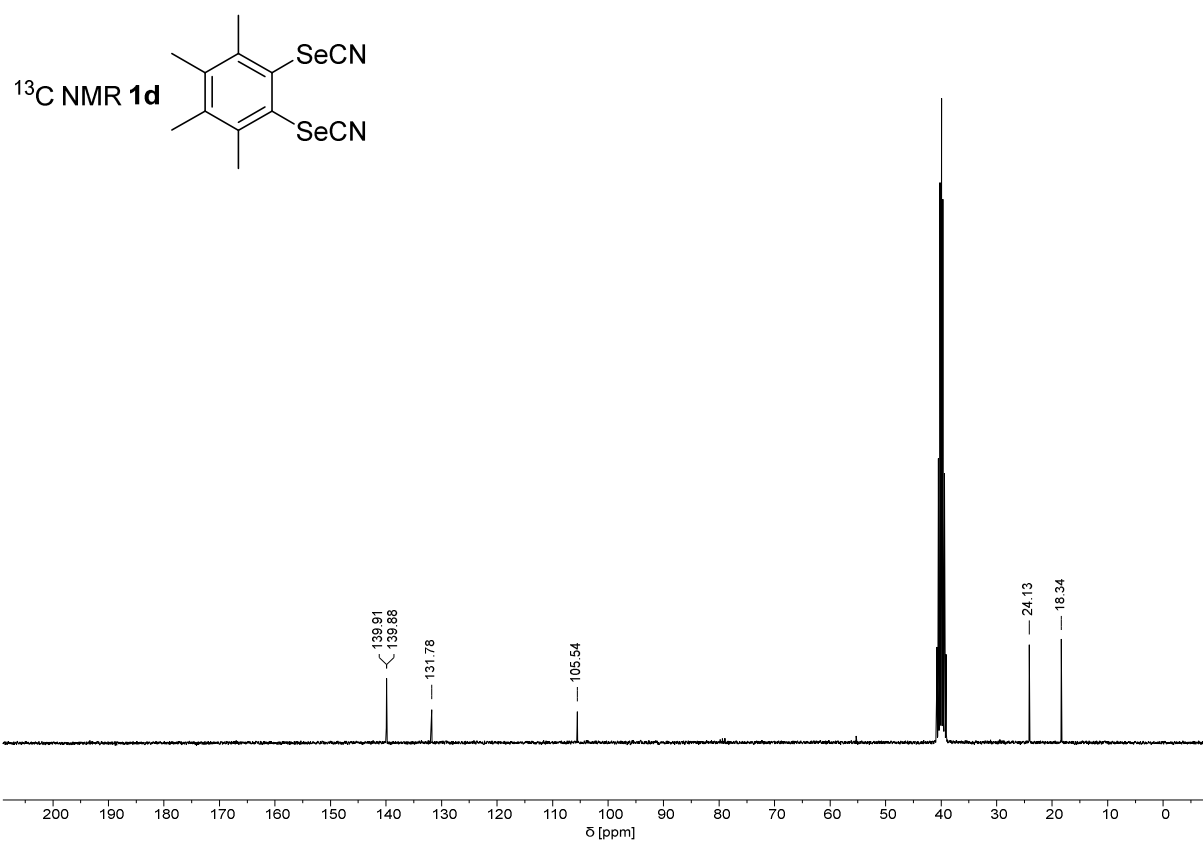

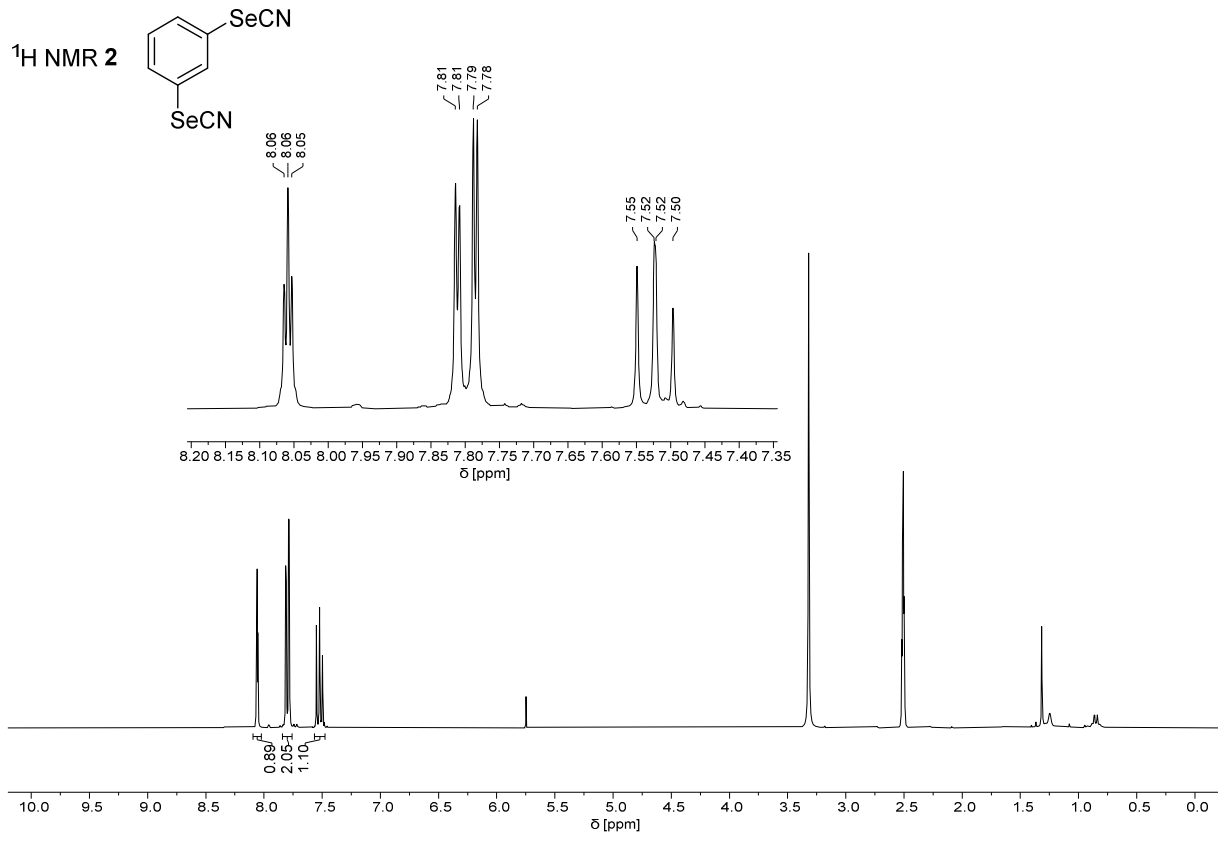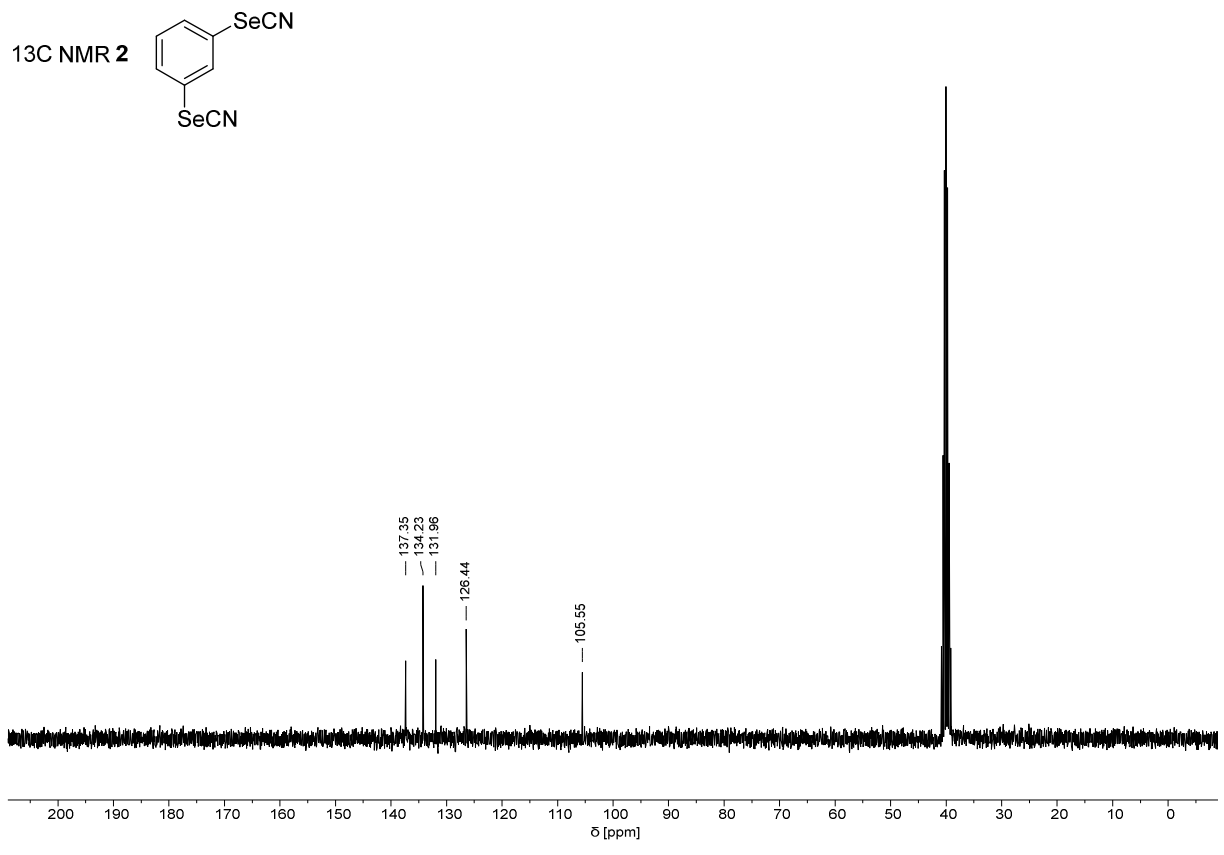

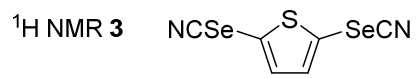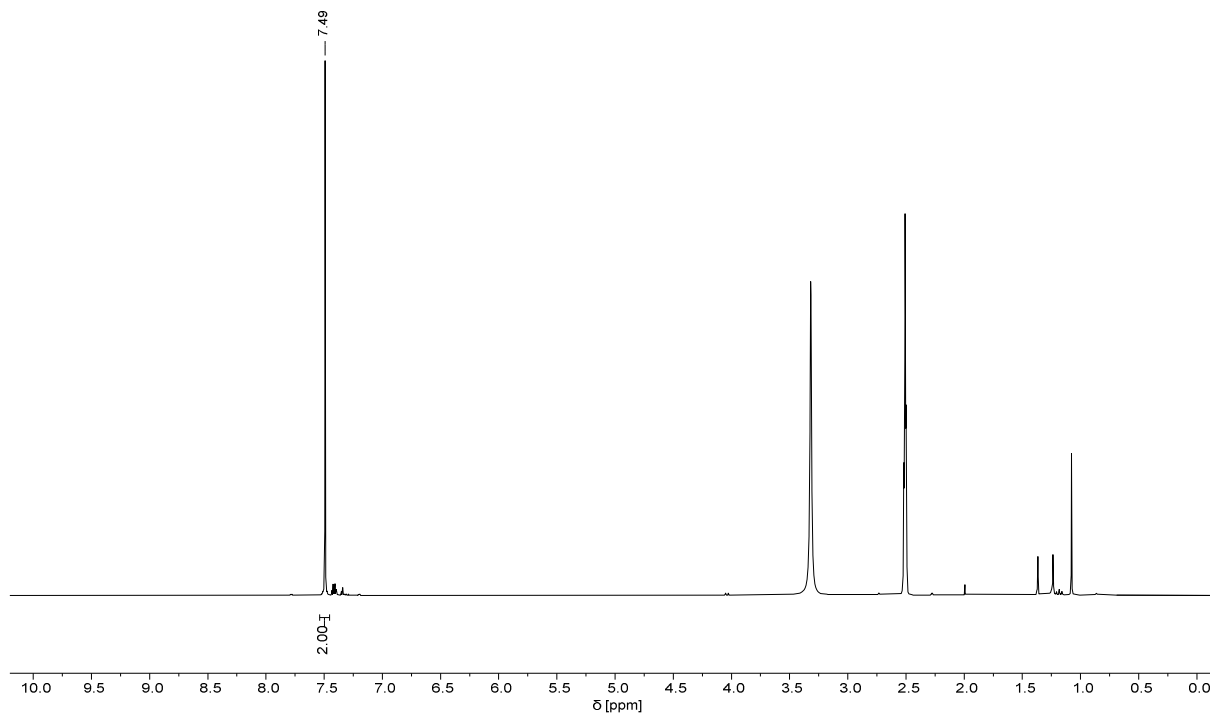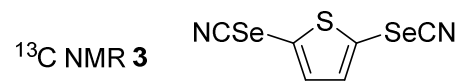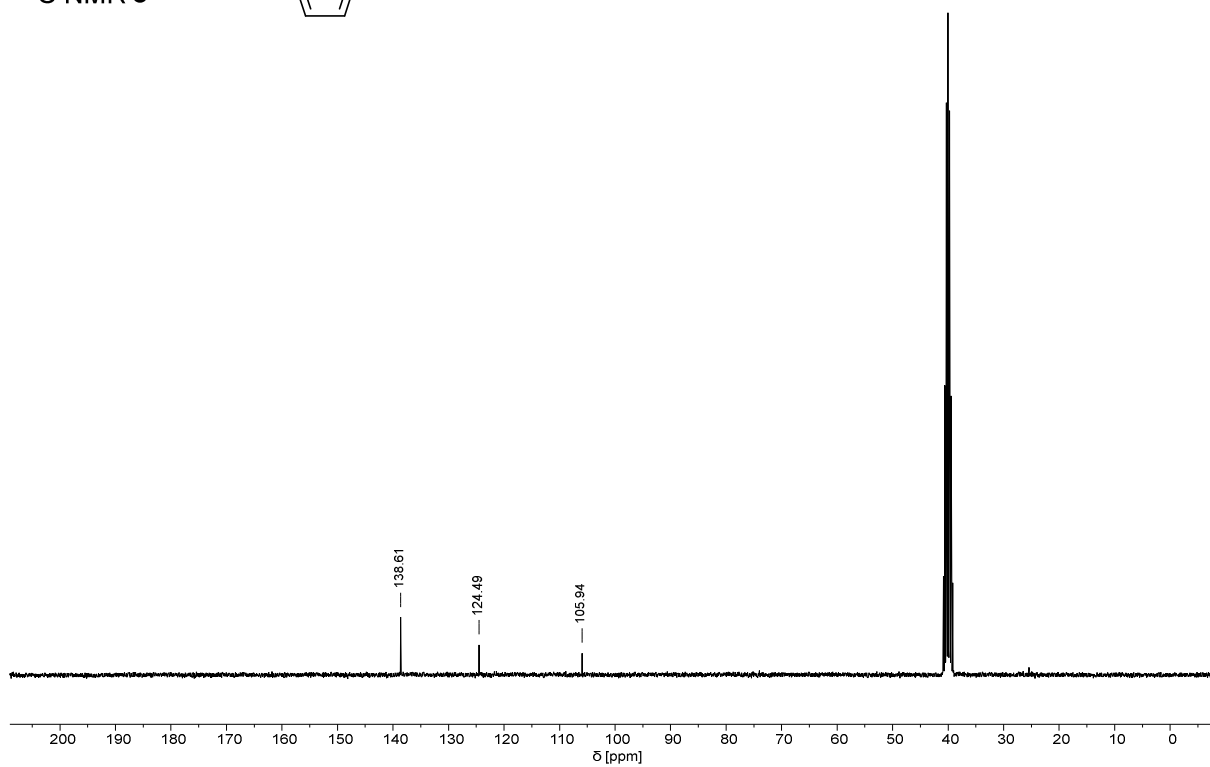



<sup>1</sup>H NMR 4

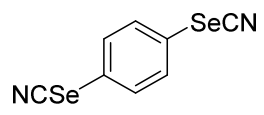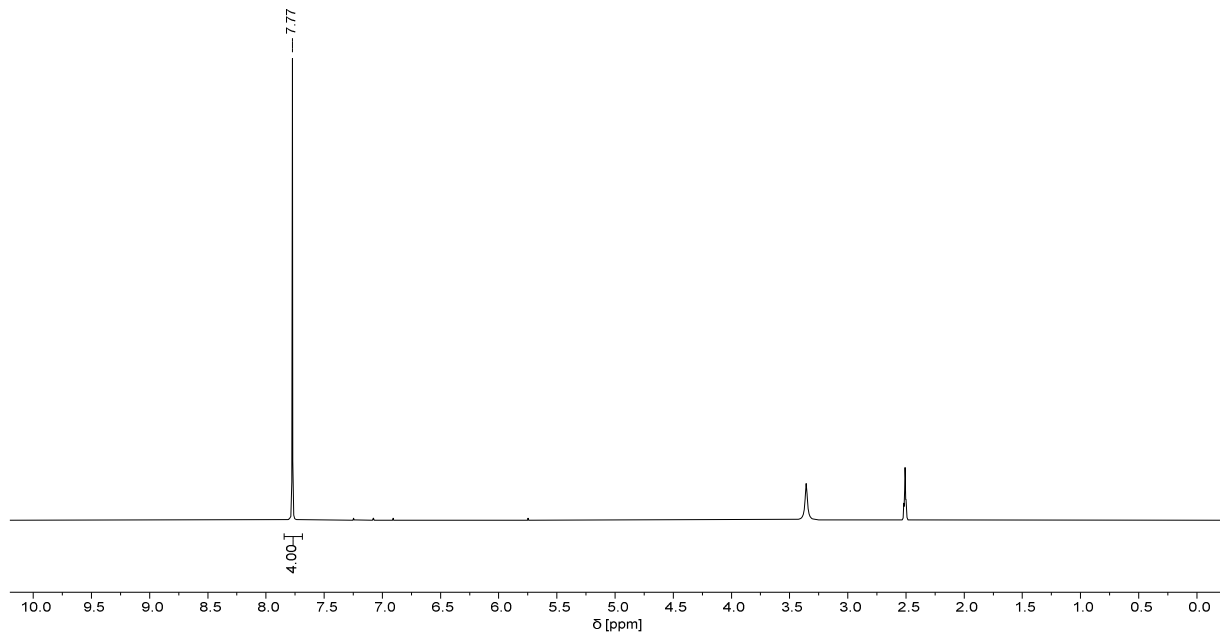

<sup>13</sup>C NMR 4

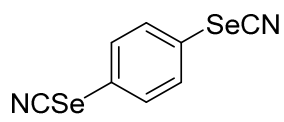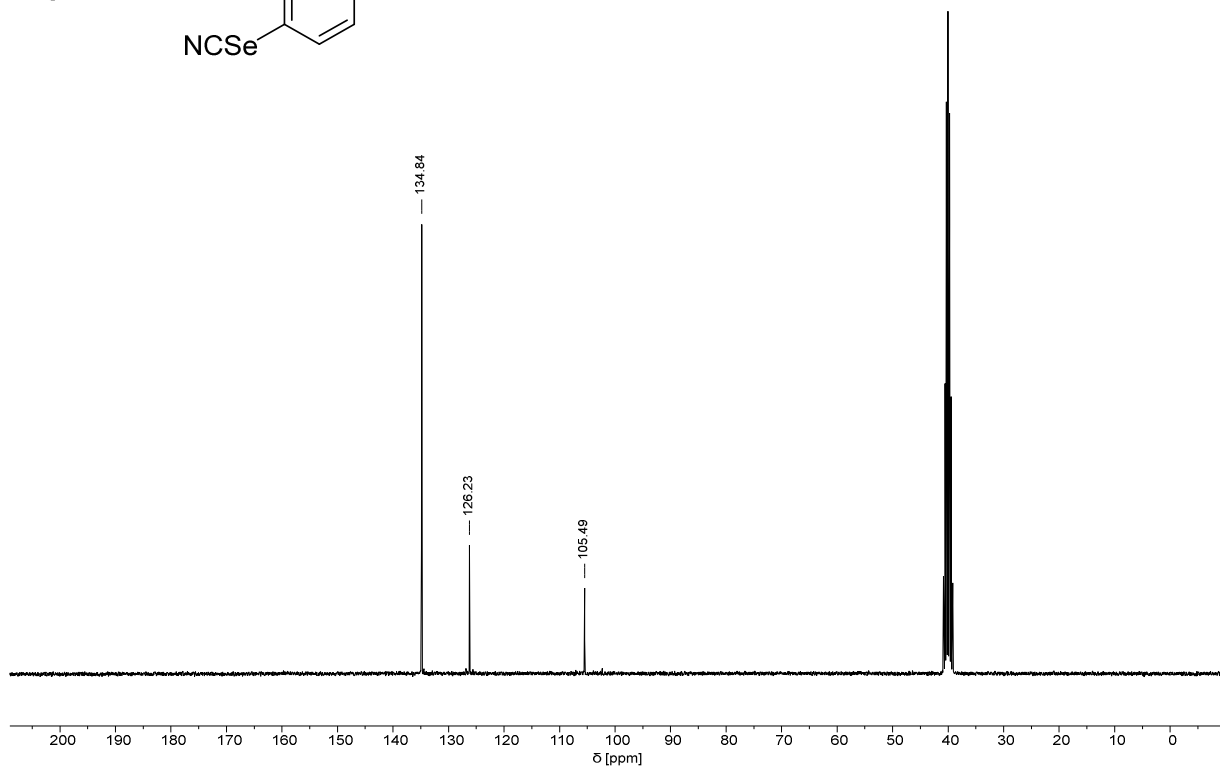

## References

- <sup>1</sup> M. J. Frisch, G. W. Trucks, H. B. Schlegel, G. E. Scuseria, M. A. Robb, J. R. Cheeseman, G. Scalmani, V. Barone, B. Mennucci, G. A. Petersson, H. Nakatsuji, M. Caricato, X. Li, H. P. Hratchian, A. F. Izmaylov, J. Bloino, G. Zheng, J. L. Sonnenberg, M. Hada, M. Ehara, K. Toyota, R. Fukuda, J. Hasegawa, M. Ishida, T. Nakajima, Y. Honda, O. Kitao, H. Nakai, T. Vreven, J. A. Montgomery, Jr., J. E. Peralta, F. Ogliaro, M. Bearpark, J. J. Heyd, E. Brothers, K. N. Kudin, V. N. Staroverov, R. Kobayashi, J. Normand, K. Raghavachari, A. Rendell, J. C. Burant, S. S. Iyengar, J. Tomasi, M. Cossi, N. Rega, J. M. Millam, M. Klene, J. E. Knox, J. B. Cross, V. Bakken, C. Adamo, J. Jaramillo, R. Gomperts, R. E. Stratmann, O. Yazyev, A. J. Austin, R. Cammi, C. Pomelli, J. W. Ochterski, R. L. Martin, K. Morokuma, V. G. Zakrzewski, G. A. Voth, P. Salvador, J. J. Dannenberg, S. Dapprich, A. D. Daniels, O. Farkas, J. B. Foresman, J. V. Ortiz, J. Cioslowski, and D. J. Fox, Gaussian 09 (Gaussian, Inc., Wallingford CT, 2009).
- <sup>2</sup> S. Grimme, J. Antony, S. Ehrlich and H. Krieg, *J. Chem. Phys.*, 2010, **132**, 154104.
- <sup>3</sup> B. P. Pritchard, D. Altarawy, B. Didier, T. D. Gibson and T. L. Windus. *J. Chem. Inf. Model.* 2019, **59**, 4814–4820.
- <sup>4</sup> AIMAll (Version 19.10.12), T. A. Keith, TK Gristmill Software, Overland Park KS, USA, 2019 ([aim.tkgristmill.com](http://aim.tkgristmill.com)).
